# Supplementary material for: Functional characterization of CNOT3 variants identified in familial adenomatous polyposis adenomas
Source: PubMed Central journal article supplement (PMC6570471; doi:10.18632/oncotarget.27003), 2019-06-11
Supplement: oncotarget-10-3939-s001.pdf [file oncotarget-10-3939-s001.pdf]

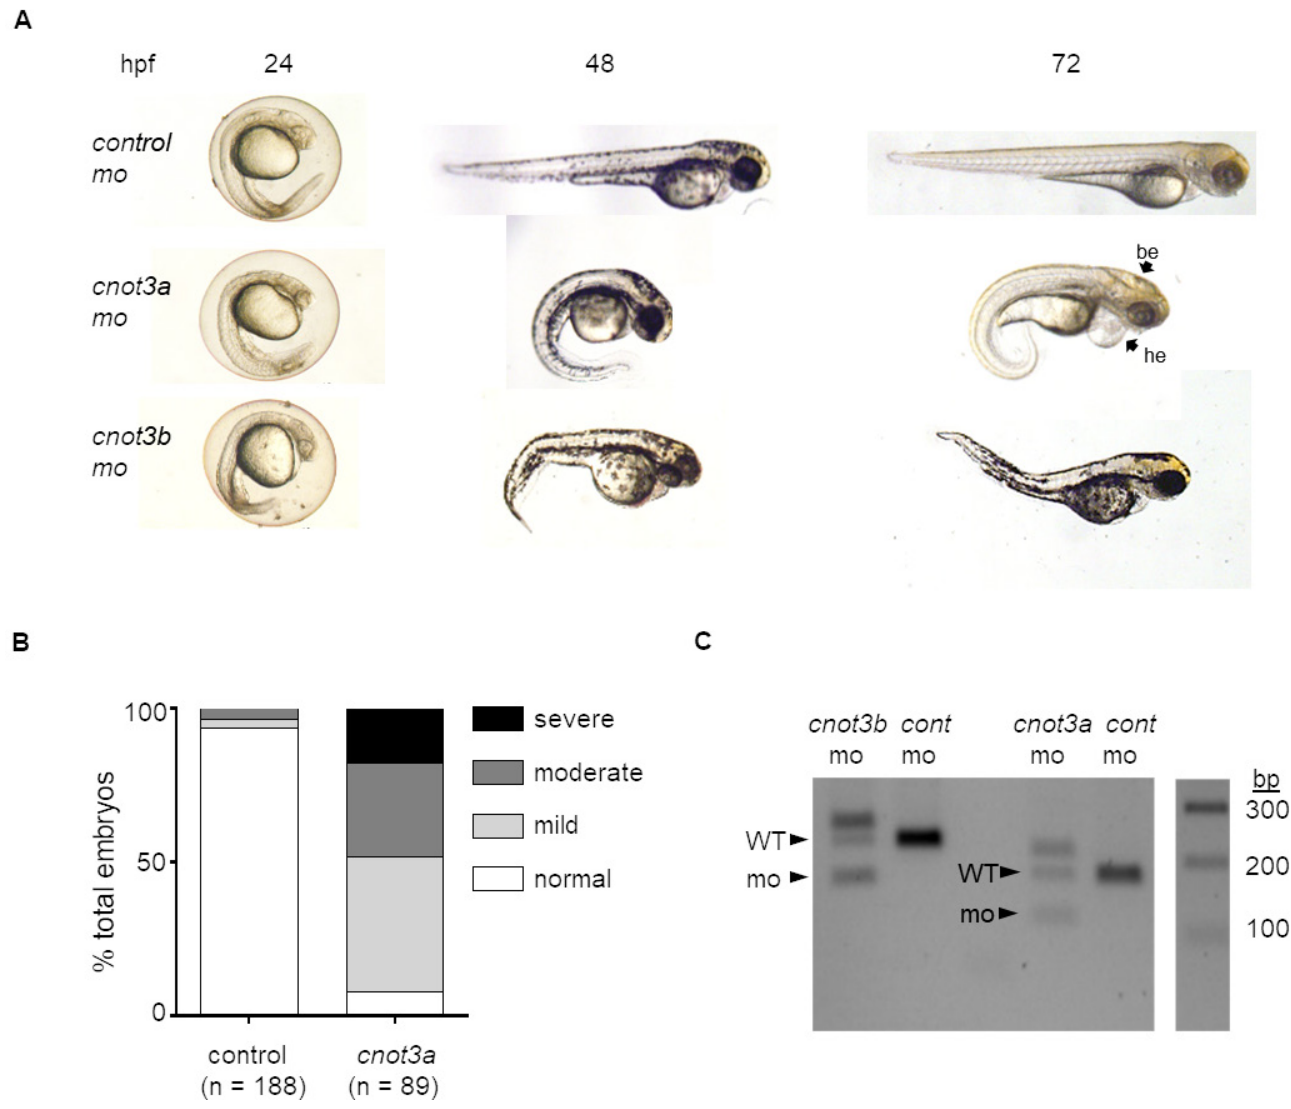

**Supplementary Figure 2: Knockdown of *cnot3* gene expression in zebrafish embryos results in head and body developmental defects.** (A) Time course development of control, *cnot3a*, and *cnot3b* mo injected zebrafish embryos. Zebrafish *cnot3* deficiency leads to lordosis at 48 hpf that persists at 72 hpf for *cnot3a* knockdown. Knockdown of *cnot3a* also leads to heart (he) and brain edema (be) at 72 hpf. Depletion of *cnot3b* results in only mild lordosis. (B) Graph depicting percentage of *cnot3a* morpholino-injected embryos with observed phenotypic defect/s compared to control mo. Lordosis phenotype is consistently seen in embryos with mild to severe phenotype (>80%). (C) PCR of cDNA prepared from 72 hpf control mo or *cnot3* morpholinos. Arrowhead show confirmatory WT and morpholino (mo) bands.

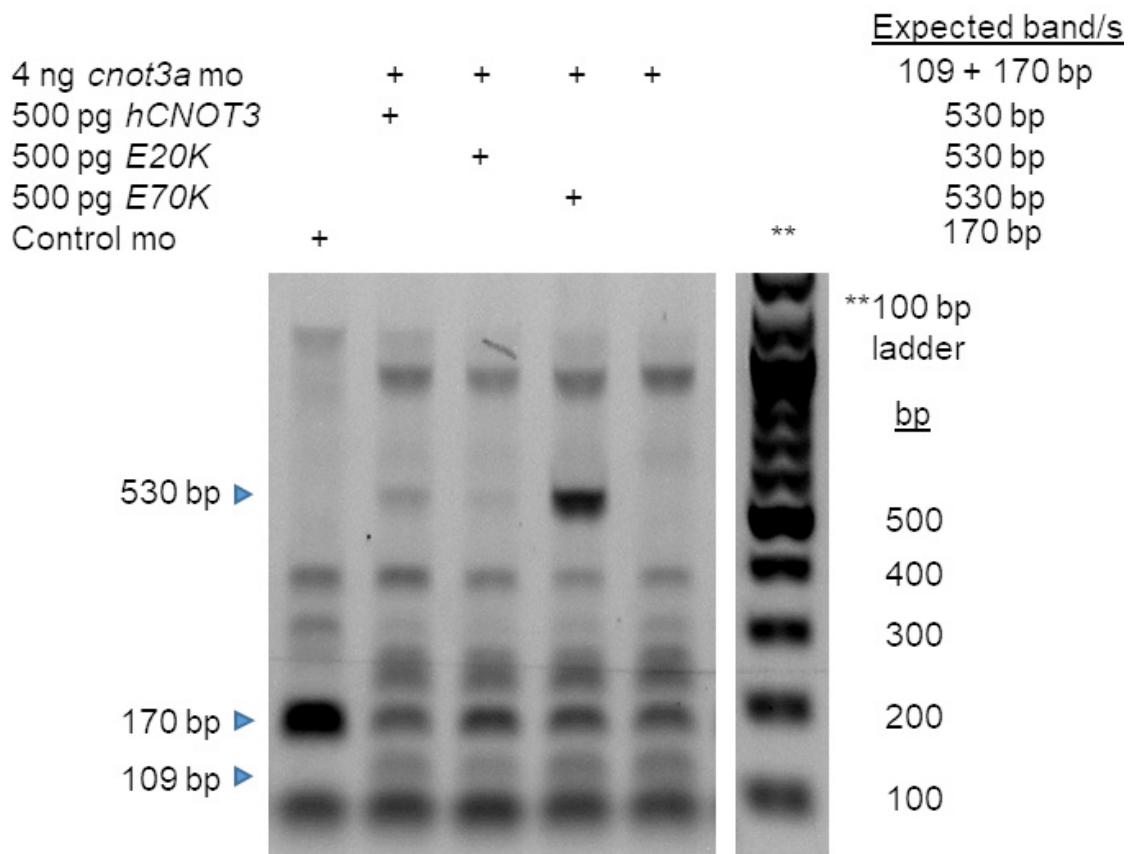

**Supplementary Figure 3: Confirmation of *cnot3a* morpholino and *hCNOT3* mRNA injections.** Figure shows gel electrophoresis from PCR run using zebrafish embryos injected with the appropriate reagent (+) as cDNA template, and using the confirmatory primers in Supplementary Table 5. Blue arrowheads show the bands - 530 bp (mRNA), 170 bp (*cnot3a*), 109 bp (mo band) – that confirm morpholino and / or mRNA injections.

**Supplementary Table 1: European Bioinformatics Institute Global and Local Protein Alignment to compare zebrafish *cnot3a* and *cnot3b* amino acid sequence to human CNOT3 protein sequence**

| Alignment Score versus Human CNOT3 amino acid sequence |               |               |
|--------------------------------------------------------|---------------|---------------|
| EBI TOOL:                                              | <i>cnot3a</i> | <i>cnot3b</i> |
| GLOBAL ALIGNMENT:                                      |               |               |
| NEEDLE                                                 | 2574          | 2173.5        |
| STRETCHER                                              | 2286          | 1876          |
| LOCAL ALIGNMENT:                                       |               |               |
| WATER                                                  | 2574          | 2190          |
| MATCHER                                                | 1970          | 1673          |
| LALIGN                                                 | 3062          | 2626          |

Larger score means better alignment.

**Supplementary Table 2: Clinical characteristics of patients analyzed**

| Patient    |        |     | Germline information |                 |                   | Ion Torrent<br>(Target sequencing) |
|------------|--------|-----|----------------------|-----------------|-------------------|------------------------------------|
| Patient ID | Gender | Age | Gene                 | cDNA            | protein           |                                    |
| MDAC02     | M      | 33  | <i>APC</i>           | c.3810T>A       | p.Cys1270*        | 2                                  |
| MDAC03     | F      | 63  | <i>APC</i>           | del exons 11-12 | p.?               | 3                                  |
| MDAC10     | F      | 22  | <i>APC</i>           | c.3440dupA      | p.Ser1148Thrfs*18 | 1                                  |
| MDAC14     | F      | 40  | <i>APC</i>           | del 8-9         | p.?               | 2                                  |
| MDAC17     | M      | 37  | <i>APC</i>           | c.1658G>A       | p.Trp553*         | 2                                  |
| MDAC18     | M      | 27  | <i>APC</i>           | c.4393_4394del  | p.Ser1465Trpfs*3  | 1                                  |
| MDAC20     | M      | 65  | <i>APC</i>           | c.477C>G        | p.Tyr159*         | 1                                  |
| MDAC21     | F      | 70  | <i>APC</i>           | c.487C>T        | p.Gln163*         | 1                                  |
| MDAC24     | F      | 25  | <i>APC</i>           | c.4733_4734del  | p.Cys1578Tyrfs*12 | 5                                  |
| MDAC26     | F      | 28  | <i>APC</i>           | c.847C>T        | p.Arg283*         | 5                                  |
| MDAC29     | F      | 25  | <i>APC</i>           | c.3810T>A       | p.Cys1270*        | 2                                  |
| MDAC32     | F      | 58  | <i>APC</i>           | c.1620insA      | p.Gln541Thrfs*19  | 3                                  |
| MDAC33     | M      | 43  | <i>APC</i>           | c.2894del       | p.Asn965Ilefs*15  | 5                                  |
| MDAC34     | M      | 29  | <i>APC</i>           | c.5936del       | p.Asn1979Thrfs*65 | 4                                  |

Abbreviations: M, male; F, female.

**Supplementary Table 3: Background information and histopathology of FAP adenoma samples**

| Sample ID  | Location         | Type of Polyp   | Size   | Sample ID  | Location         | Type of Polyp            | Size   |
|------------|------------------|-----------------|--------|------------|------------------|--------------------------|--------|
| MDAC02_P02 | Rectum           | N/A             | N/A    | MDAC26_P02 | Rectum           | N/A                      | < 5 mm |
| MDAC02_P03 | Rectum           | N/A             | N/A    | MDAC26_P03 | Rectum           | N/A                      | < 5 mm |
| MDAC03_P03 | Rectum           | N/A             | > 5 mm | MDAC26_P04 | Rectum           | N/A                      | < 5 mm |
| MDAC03_P01 | Rectum           | N/A             | > 5 mm | MDAC26_P05 | Rectum           | N/A                      | < 5 mm |
| MDAC03_P02 | Rectum           | N/A             | > 5 mm | MDAC29_P01 | N/A              | Tubular Adenoma          | > 5 mm |
| MDAC10_P02 | Rectum           | Tubular Adenoma | < 5 mm | MDAC29_P02 | N/A              | Tubular Adenoma with HGD | > 5 mm |
| MDAC14_P04 | Rectum           | N/A             | < 5 mm | MDAC32_P03 | Ascending colon  | Tubular Adenoma          | < 5 mm |
| MDAC14_P05 | Rectum           | N/A             | < 5 mm | MDAC32_P01 | Ascending colon  | Tubular Adenoma          | < 5 mm |
| MDAC17_P03 | Rectum           | Tubular Adenoma | < 5 mm | MDAC32_P02 | Sigmoid          | Tubular Adenoma          | < 5 mm |
| MDAC17_P04 | Rectum           | Tubular Adenoma | < 5 mm | MDAC33_P03 | Rectosigmoid     | N/A                      | N/A    |
| MDAC18_P02 | Rectum           | N/A             | > 5 mm | MDAC33_P01 | Ascending colon  | N/A                      | N/A    |
| MDAC20_P02 | Rectum           | Tubular Adenoma | < 5 mm | MDAC33_P04 | Ascending colon  | N/A                      | N/A    |
| MDAC21_P01 | Rectum           | Tubular Adenoma | < 5 mm | MDAC33_P05 | Ascending colon  | N/A                      | N/A    |
| MDAC24_P01 | Rectum           | Tubular Adenoma | < 5 mm | MDAC33_P02 | Ascending colon  | N/A                      | N/A    |
| MDAC24_P02 | Sigmoid          | Tubular Adenoma | < 5 mm | MDAC34_P02 | Ascending colon  | Tubular Adenoma          | < 5 mm |
| MDAC24_P03 | Transverse colon | Tubular Adenoma | < 5 mm | MDAC34_P03 | Splenic flexure  | Hyperplastic polyp       | < 5 mm |
| MDAC24_P04 | Hepatic flexure  | Tubular Adenoma | < 5 mm | MDAC34_P01 | Descending colon | Tubular Adenoma          | < 5 mm |
| MDAC24_P05 | Transverse colon | Tubular Adenoma | < 5 mm | MDAC34_P04 | Sigmoid          | Tubular Adenoma          | < 5 mm |
| MDAC26_P01 | Rectum           | N/A             | < 5 mm |            |                  |                          |        |

**Supplementary Table 4: Summary of detected CNOT3 mutations using the ion torrent platform and their functional *in silico* analysis**

| chr | hg19 pos | ref | alt | region type | gene  | mutation type        | Uniprot aa pos | aa ref | aa alt | PhyloP | SIFT | Polyphen2 HDIV |
|-----|----------|-----|-----|-------------|-------|----------------------|----------------|--------|--------|--------|------|----------------|
| 19  | 54647842 | A   | C   | exonic      | CNOT3 | nonsynonymous SNV    | 120            | E      | A      | 1.998  | 0.56 | D;D;D          |
| 19  | 54650354 | T   | G   | exonic      | CNOT3 | nonsynonymous SNV    | .              | I      | R      | 0.144  | .    | .              |
| 19  | 54650355 | A   | G   | exonic      | CNOT3 | nonsynonymous SNV    | 286            | K      | E      | 2.043  | 0.74 | D;D;D          |
| 19  | 54650355 | A   | G   | exonic      | CNOT3 | nonsynonymous SNV    | 286            | K      | E      | 2.043  | 0.74 | D;D;D          |
| 19  | 54650355 | A   | G   | exonic      | CNOT3 | nonsynonymous SNV    | 286            | K      | E      | 2.043  | 0.74 | D;D;D          |
| 19  | 54650355 | A   | G   | exonic      | CNOT3 | nonsynonymous SNV    | 286            | K      | E      | 2.043  | 0.74 | D;D;D          |
| 19  | 54653350 | -   | C   | exonic      | CNOT3 | frameshift insertion | .              | .      | .      | .      | .    | .              |

| chr | hg19 pos | Polyphen2 HVAR | LRT | Mutation Taster | Mutation Assessor | Sample ID  | Frequency | Annovar change                                    | Depth |
|-----|----------|----------------|-----|-----------------|-------------------|------------|-----------|---------------------------------------------------|-------|
| 19  | 54647842 | D;D;D          | D   | D               | L                 | MDAC14_P05 | 0.037145  | CNOT3:NM_014516:exon6:c. A359C:p.E120A            | 5840  |
| 19  | 54650354 | .              | .   | D               | N                 | MDAC34_P04 | 0.027923  | CNOT3:NM_014516:exon10:c. T855G:p.D285E           | 563   |
| 19  | 54650355 | D;D;D          | D   | D               | N                 | MDAC24_P02 | 0.043937  | CNOT3:NM_014516:exon10:c. A856G:p.K286E           | 531   |
| 19  | 54650355 | D;D;D          | D   | D               | N                 | MDAC29_P01 | 0.040477  | CNOT3:NM_014516:exon10:c. A856G:p.K286E           | 1789  |
| 19  | 54650355 | D;D;D          | D   | D               | N                 | MDAC32_P01 | 0.059016  | CNOT3:NM_014516:exon10:c. A856G:p.K286E           | 570   |
| 19  | 54650355 | D;D;D          | D   | D               | N                 | MDAC34_P02 | 0.074935  | CNOT3:NM_014516:exon10:c. A856G:p.K286E           | 724   |
| 19  | 54653350 | .              | .   | .               | .                 | MDAC24_P01 | 0.12126   | CNOT3:NM_014516:exon13:c. .1462_1463insC:p.G488fs | 629   |

Abbreviations: chr, chromosome; hg19 pos, human genome position; ref, reference, alt, alteration; AA, amino acid; SNV, single nucleotide polymorphism; N, neutral; D, probably damaging, B, benign, P, possibly damaging; H, higher impact; M, medium impact; L, lower impact.

**Supplementary Table 5: Morpholino and primer sequences**

| <b>MORPHOLINOS</b>    | <b>5' - 3' sequence</b>   |
|-----------------------|---------------------------|
| cnot3a                | GTTACACCGTGTGTCTTACCTTGA  |
| ctbp1                 | TCCTTATGACGATACCTTCTCATGG |
| cnot3b                | TTCTCCTGTTACCATACCTTGAAGT |
| <b>PCR PRIMERS</b>    | <b>5' - 3' sequence</b>   |
| cnot3a F              | GGTCCTGGCTGACACAC         |
| cnot3a R              | GTCTTCAAACGTTCGACGC       |
| CNOT3 F               | CACCAAGGAGCAGCTCTATC      |
| CNOT3 R               | CCTTATCGTCGTCATCCTTG      |
| cnot3b F              | TGAAAAGTTGGAGGAATCGTG     |
| cnot3b R              | TTTCTTCATGCCTTCTTCTGC     |
| <b>RT-PCR PRIMERS</b> | <b>5' - 3' sequence</b>   |
| cnot3a F              | CGTCCGATTGAGAGAGAATCA     |
| cnot3a R              | GAATGATGTGGGGGCATCT       |
| cnot3b F              | TGAAAAGTTGGAGGAATCGTG     |
| cnot3b R              | TTTCTTCATGCCTTCTTCTGC     |
| $\beta$ -ACTIN_F      | CCCAGAGCAAGAGAGGTATC      |
| $\beta$ -ACTIN_R      | AGAGCATAGCCCTCGTAGAT      |
| CNOT3_RT_F            | CGCAAATGGAACGGTTCAAAG     |
| CNOT3_RT_R            | GTATTCGTGAGCCACTGGCCA     |
